# Supplementary material for: Thermoreversible (Ionic-Liquid-Based) Aqueous Biphasic Systems
Source: PubMed Central journal article supplement (PMC4740753; doi:10.1038/srep20276), 2016-02-04
Supplement: srep20276-s1.pdf [file srep20276-s1.pdf]

# Supporting Information

Thermoreversible (Ionic-Liquid-Based)

Aqueous Biphasic Systems

Helena Passos, Andreia Luís, João A. P. Coutinho, Mara G. Freire\*

CICECO - Aveiro Institute of Materials, Department of Chemistry, University of

Aveiro, 3810-193 Aveiro, Portugal

\*E-mail: maragfreire@ua.pt

## Supplementary Figures

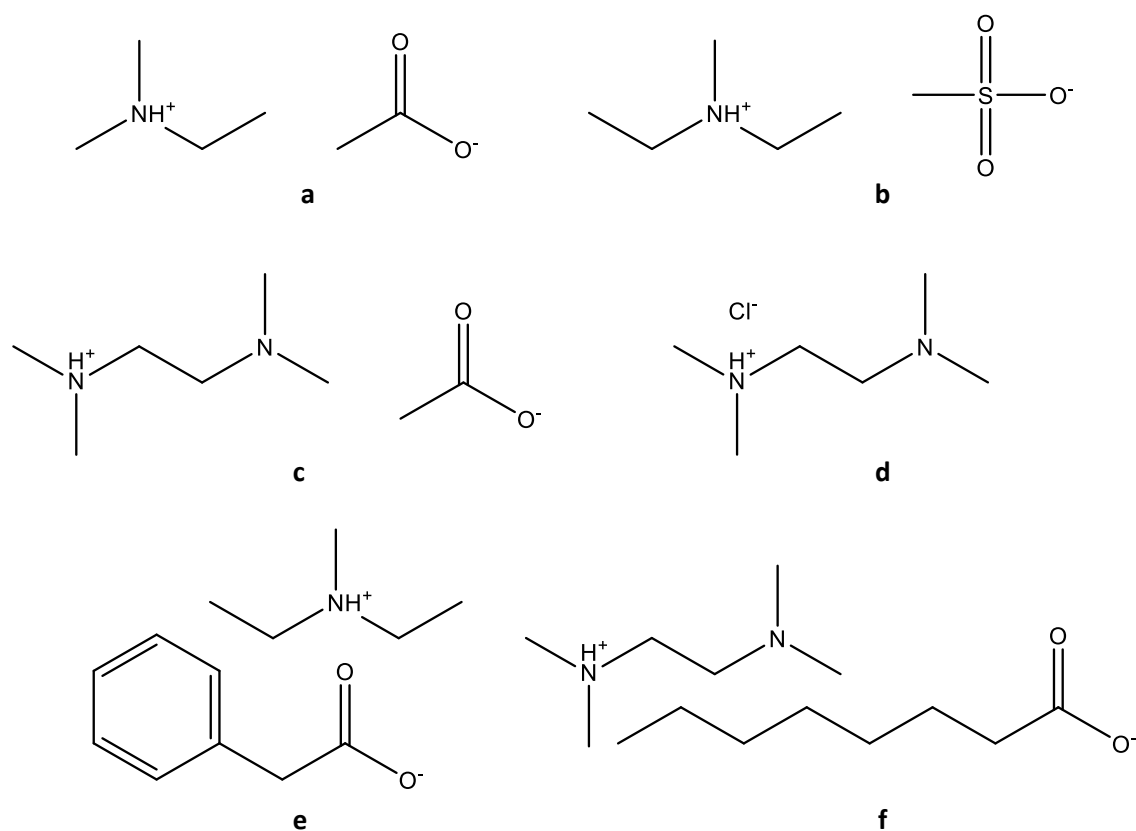

**Supplementary Figure 1:** Chemical structure of the PILs studied: (a)  $[N_{1120}][C_1CO_2]$ ; (b)  $[N_{1220}][C_1SO_3]$ ; (c)  $[N_{11[2(N11)]0}][C_1CO_2]$ ; (d)  $[N_{11[2(N11)]0}]Cl$ ; (e)  $[N_{1120}][C_7H_7CO_2]$ ; (f)  $[N_{11[2(N11)]0}][C_7CO_2]$ .

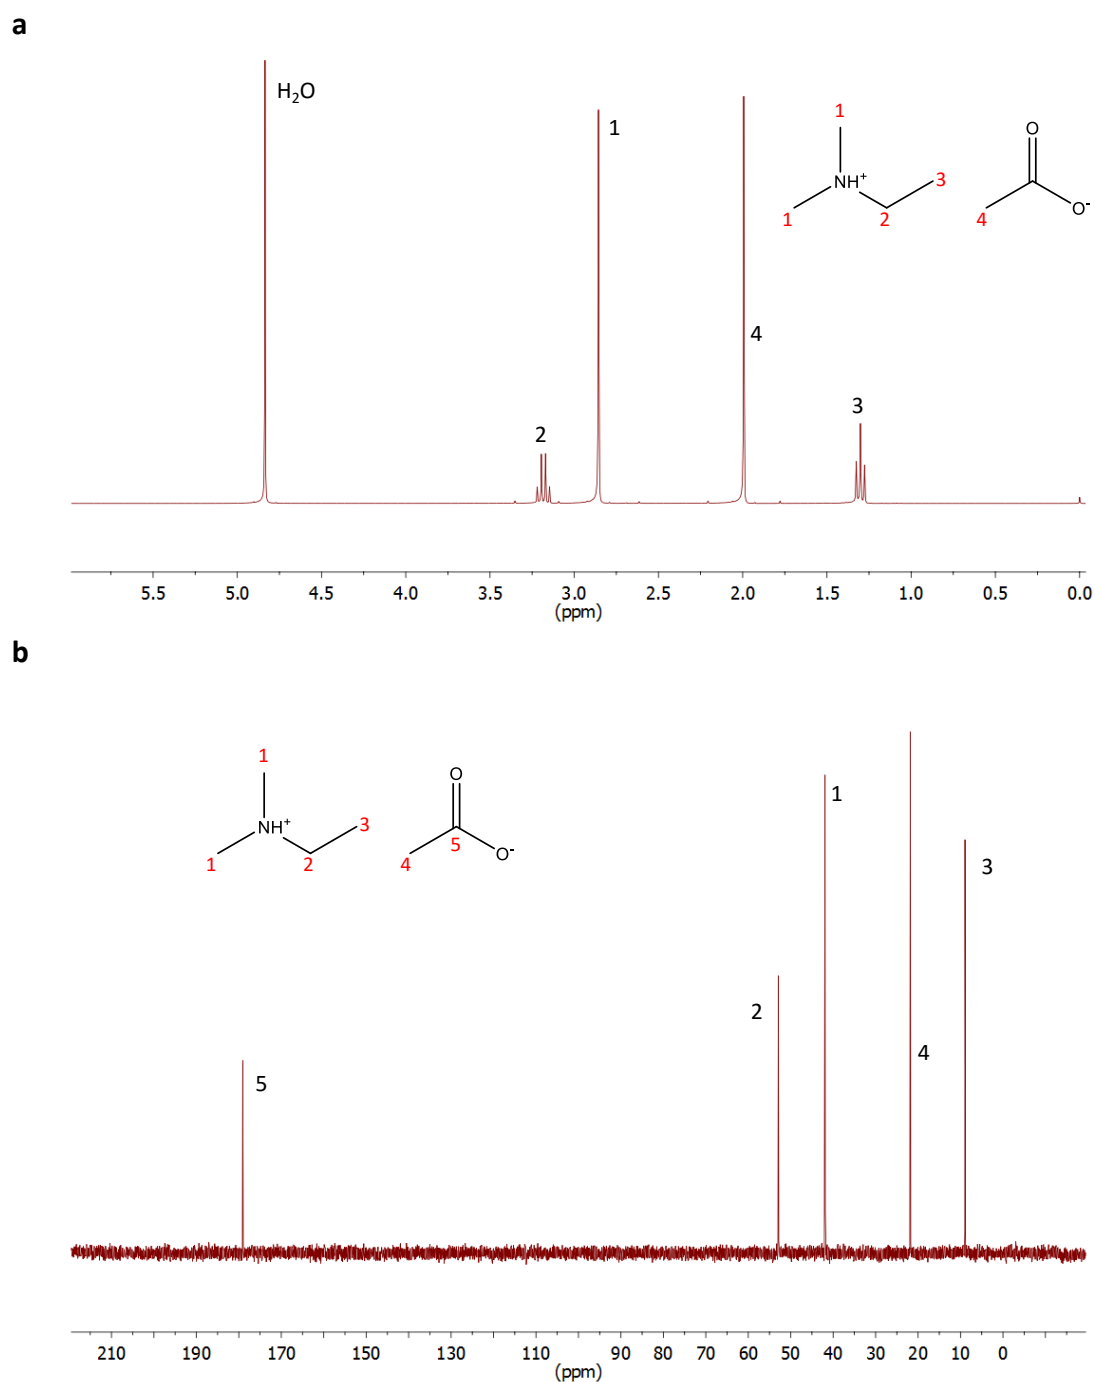

**Supplementary Figure 2.** NMR spectra of the purified  $[N_{1120}][C_1CO_2]$  in  $D_2O$ . (*a*)  $^1H$  NMR spectrum; (*b*)  $^{13}C$  NMR spectrum.  $^1H$  NMR ( $D_2O$ , 300 MHz, [ppm]):  $\delta$  3.22-3.15 (m, 2H,  $NCH_2CH_3$ ), 2.86 (s, 6H,  $N(CH_3)_2$ ), 1.99 (s, 3H,  $CH_3CO_2$ ), 1.33-1.28 (m, 3H,  $NCH_2CH_3$ ).  $^{13}C$  NMR ( $D_2O$ , 75.47 MHz, [ppm]):  $\delta$  179.1 ( $CH_3CO_2$ ), 52.9 ( $NCH_2CH_3$ ), 42.0 ( $N(CH_3)_2$ ), 21.8 ( $CH_3CO_2$ ), 9.1 ( $NCH_2CH_3$ ).

**a**

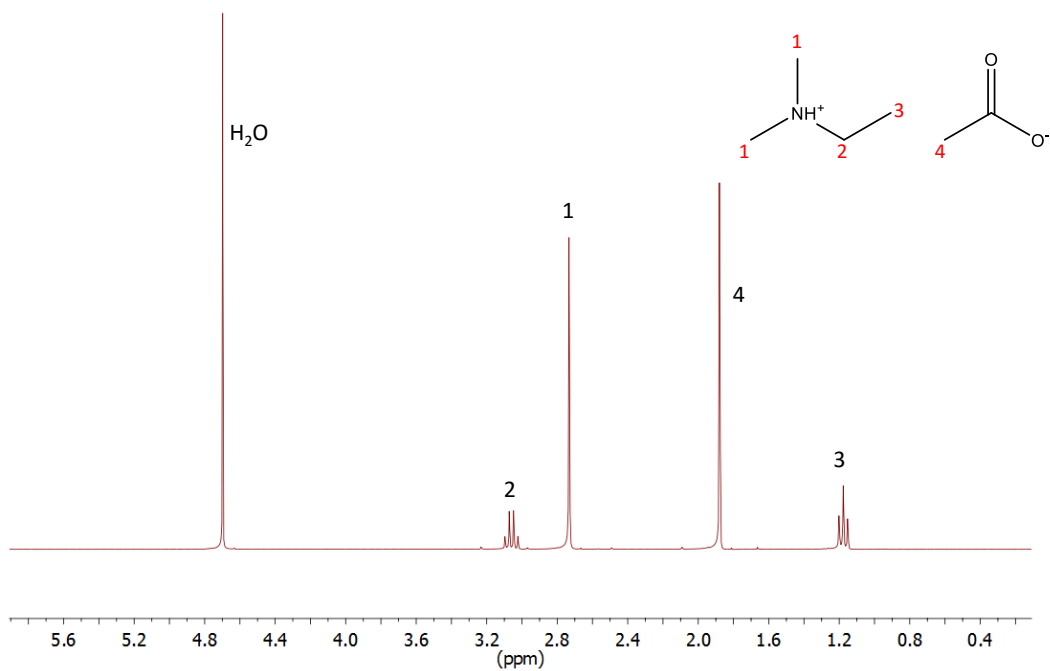

**b**

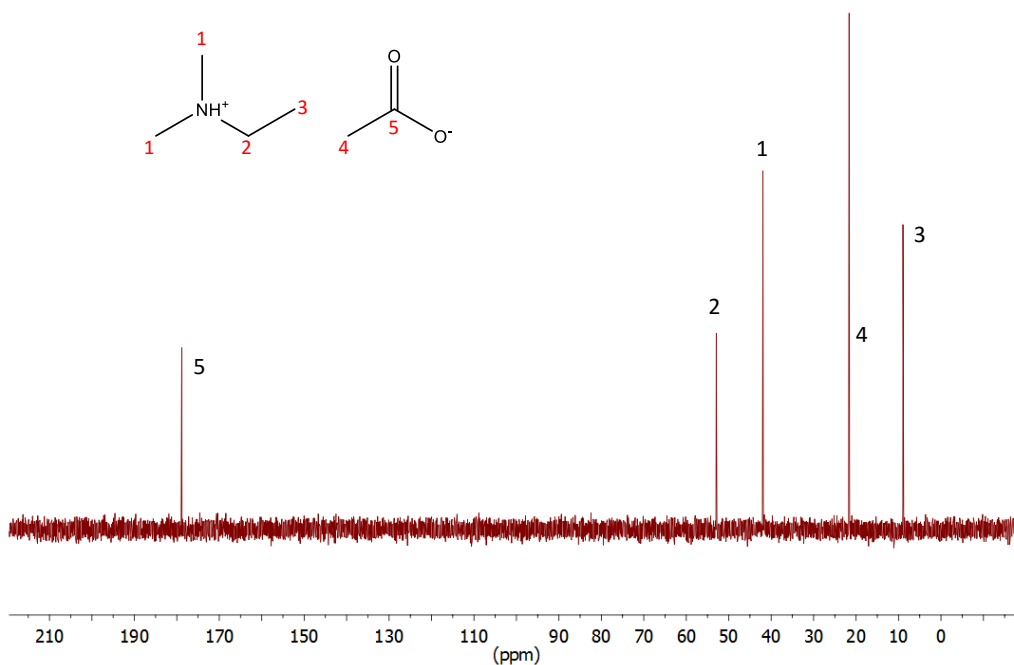

**Supplementary Figure 3.** NMR spectra of the purified  $[N_{1120}][C_1CO_2]$  in  $D_2O$ , and after 12 h at 55 °C. (*a*)  $^1H$  NMR spectrum; (*b*)  $^{13}C$  NMR spectrum.  $^1H$  NMR ( $D_2O$ , 300 MHz, [ppm]):  $\delta$  3.10-3.02 (m, 2H,  $NCH_2CH_3$ ), 2.73 (s, 6H,  $N(CH_3)_2$ ), 1.88 (s, 3H,  $CH_3CO_2$ ), 1.20-1.15 (m, 3H,  $NCH_2CH_3$ ).  $^{13}C$  NMR ( $D_2O$ , 75.47 MHz, [ppm]):  $\delta$  178.8 ( $CH_3CO_2$ ), 52.9 ( $NCH_2CH_3$ ), 41.9 ( $N(CH_3)_2$ ), 21.6 ( $CH_3CO_2$ ), 8.9 ( $NCH_2CH_3$ ).

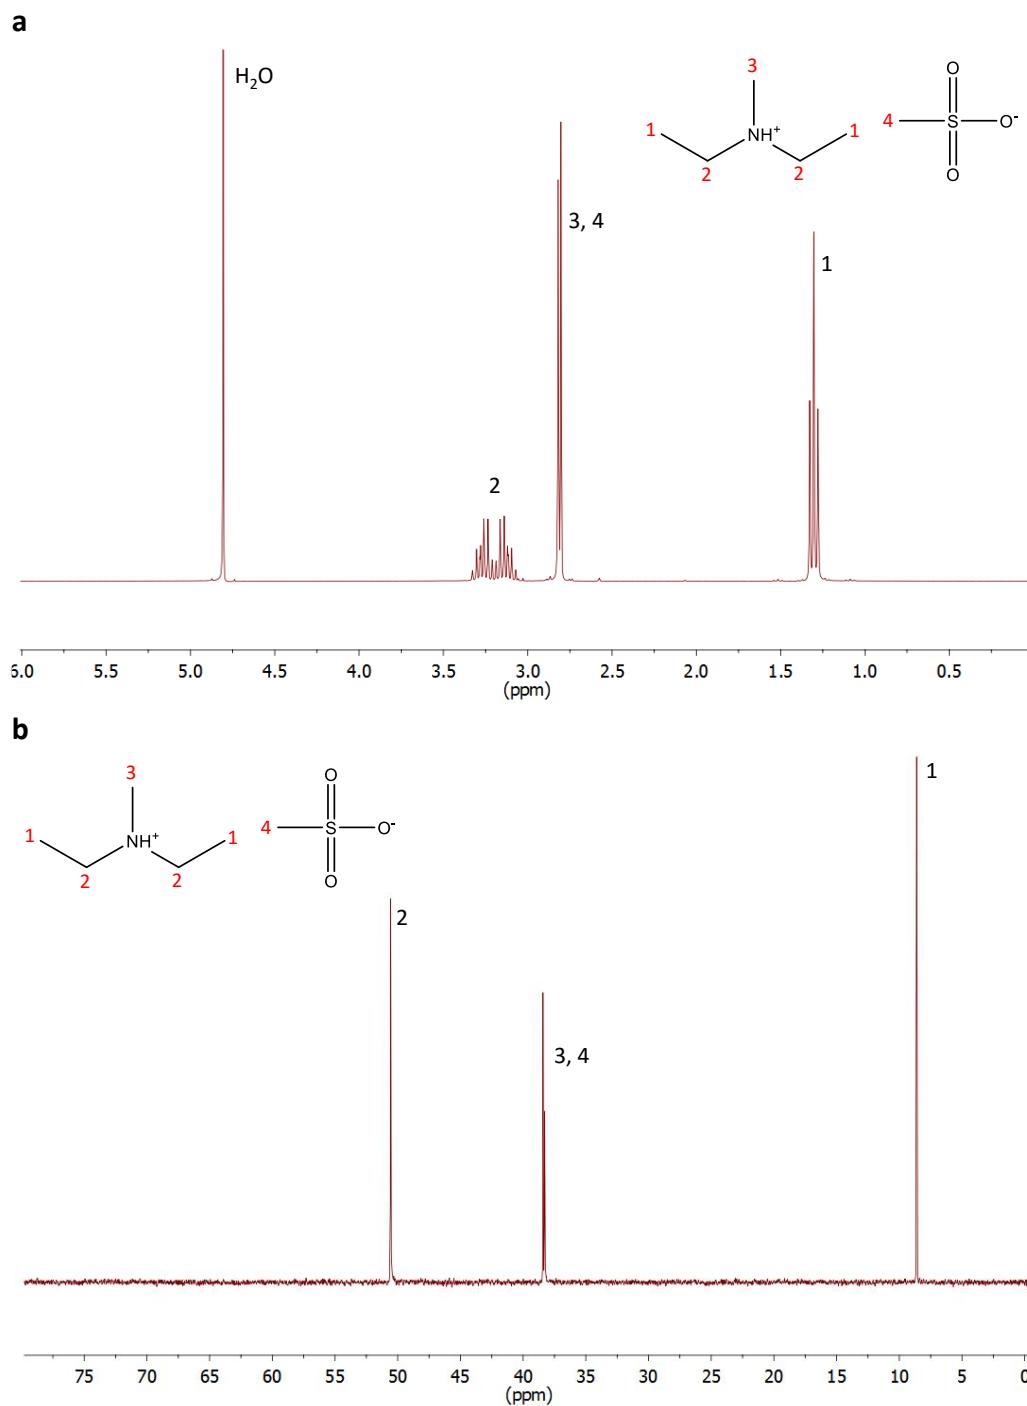

**Supplementary Figure 4.** NMR spectra of the purified  $[N_{1220}][C_1SO_3]$  in  $D_2O$ . **(a)**  $^1H$  NMR spectrum; **(b)**  $^{13}C$  NMR spectrum.  $^1H$  NMR ( $D_2O$ , 300 MHz, [ppm]):  $\delta$  3.33-3.07 (m, 4H,  $N(\underline{C}H_2CH_3)_2$ ), 2.82 (s, 3H,  $N\underline{C}H_3$ ), 2.80 (s, 3H,  $S\underline{C}H_3$ ) 1.33-1.28 (m, 6H,  $N(\underline{C}H_2\underline{C}H_3)_2$ ).  $^{13}C$  NMR ( $D_2O$ , 75.47 MHz, [ppm]):  $\delta$  50.6 ( $N(\underline{C}H_2\underline{C}H_3)_2$ ), 38.4 ( $N\underline{C}H_3$ ), 38.3 ( $S\underline{C}H_3$ ), 8.6 ( $N(\underline{C}H_2\underline{C}H_3)_2$ ).

**a**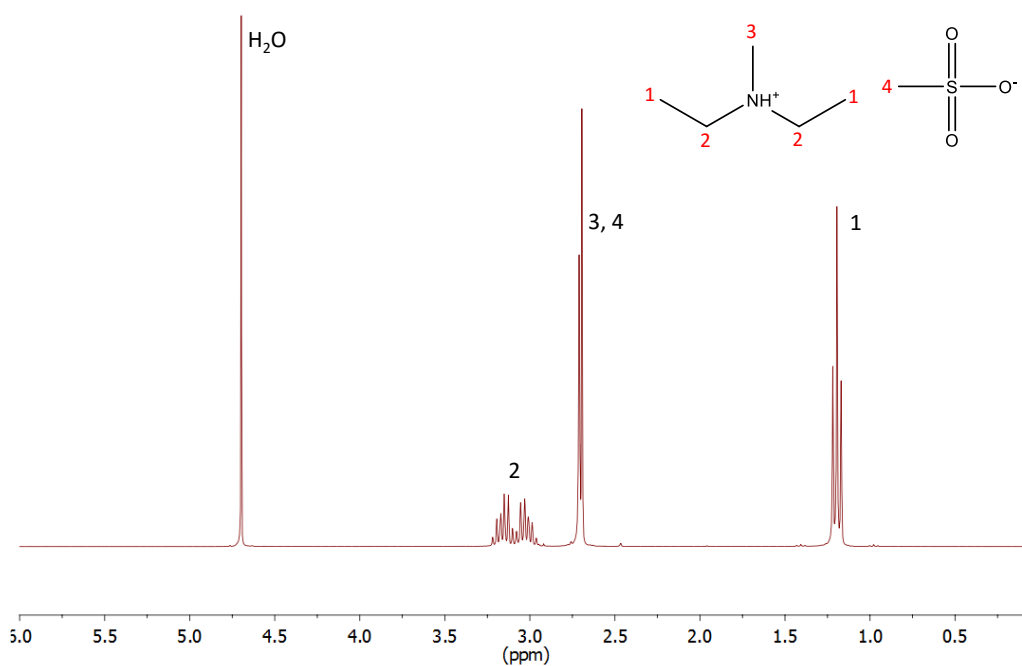**b**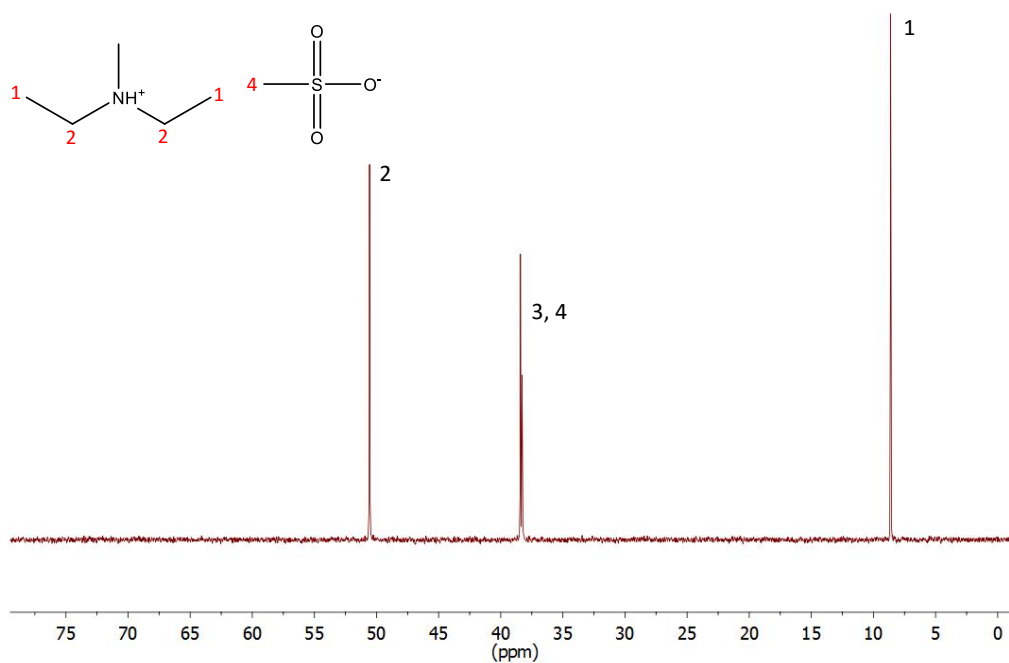

**Supplementary Figure 5.** NMR spectra of the purified  $[\text{N}_{1220}][\text{C}_1\text{SO}_3]$  in  $\text{D}_2\text{O}$ , and after 12 h at  $55^\circ\text{C}$ . (*a*)  $^1\text{H}$  NMR spectrum; (*b*)  $^{13}\text{C}$  NMR spectrum.  $^1\text{H}$  NMR ( $\text{D}_2\text{O}$ , 300 MHz, [ppm]):  $\delta$  3.22-2.96 (m, 4H,  $\text{N}(\underline{\text{C}}\text{H}_2\text{C}\text{H}_3)_2$ ), 2.71 (s, 3H,  $\text{N}\underline{\text{C}}\text{H}_3$ ), 2.69 (s, 3H,  $\text{S}\underline{\text{C}}\text{H}_3$ ) 1.22-1.17 (m, 6H,  $\text{N}(\text{C}\underline{\text{H}}_2\text{C}\underline{\text{H}}_3)_2$ ).  $^{13}\text{C}$  NMR ( $\text{D}_2\text{O}$ , 75.47 MHz, [ppm]):  $\delta$  50.6 ( $\text{N}(\underline{\text{C}}\text{H}_2\text{C}\text{H}_3)_2$ ), 38.4 ( $\text{N}\underline{\text{C}}\text{H}_3$ ), 38.3 ( $\text{S}\underline{\text{C}}\text{H}_3$ ), 8.6 ( $\text{N}(\text{C}\underline{\text{H}}_2\text{C}\underline{\text{H}}_3)_2$ ).

**a**

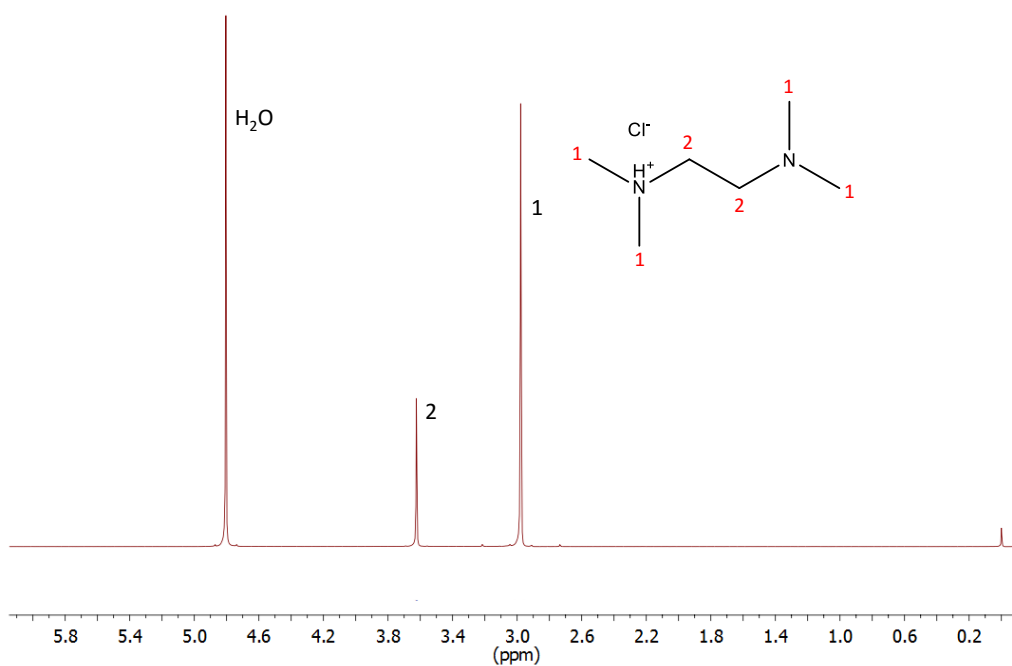

**b**

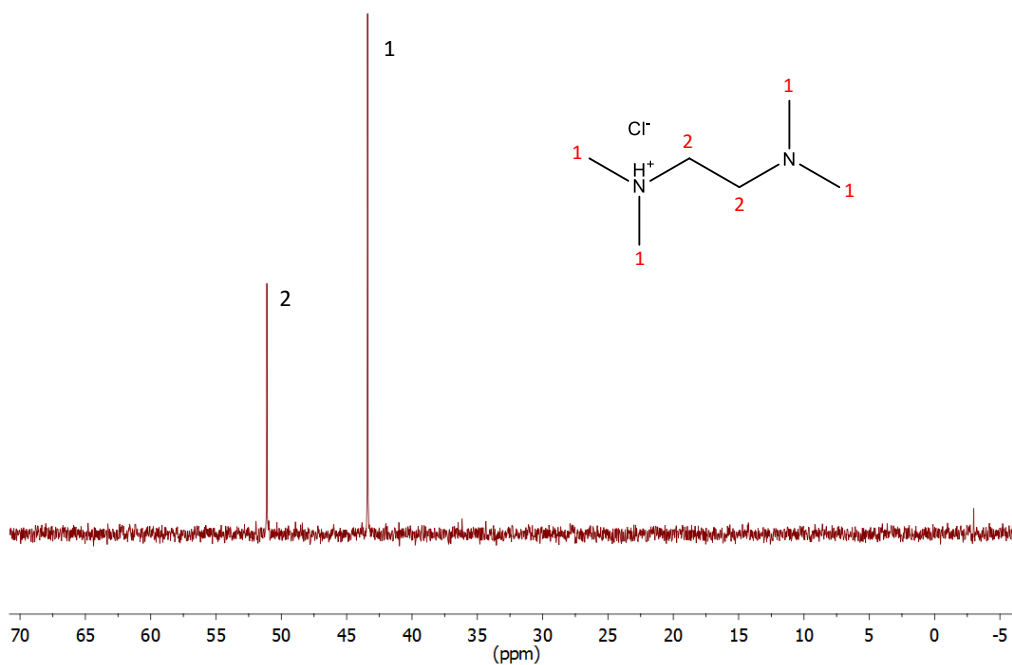

**Supplementary Figure 6.** NMR spectra of the purified  $[\text{N}_{11}[\text{2}(\text{N}_{11})_0]\text{Cl}]$  in  $\text{D}_2\text{O}$ . **(a)**  $^1\text{H}$  NMR spectrum; **(b)**  $^{13}\text{C}$  NMR spectrum.  $^1\text{H}$  NMR ( $\text{D}_2\text{O}$ , 300 MHz, [ppm]):  $\delta$  3.62 (s, 4H,  $\text{N}(\underline{\text{C}}\text{H}_2)_2$ ), 2.98 (s, 12H,  $2\text{N}(\underline{\text{C}}\text{H}_3)_2$ ).  $^{13}\text{C}$  NMR ( $\text{D}_2\text{O}$ , 75.47 MHz, [ppm]):  $\delta$  51.1 ( $\text{N}(\underline{\text{C}}\text{H}_2)_2$ ), 43.4 ( $\text{N}(\underline{\text{C}}\text{H}_3)_2$ ).

**a**

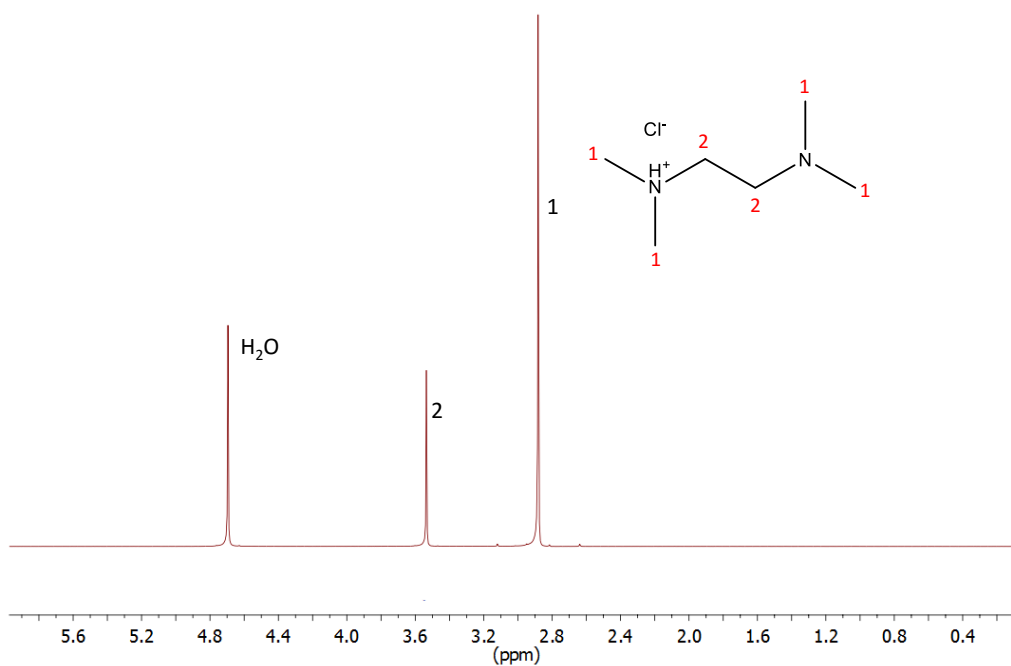

**b**

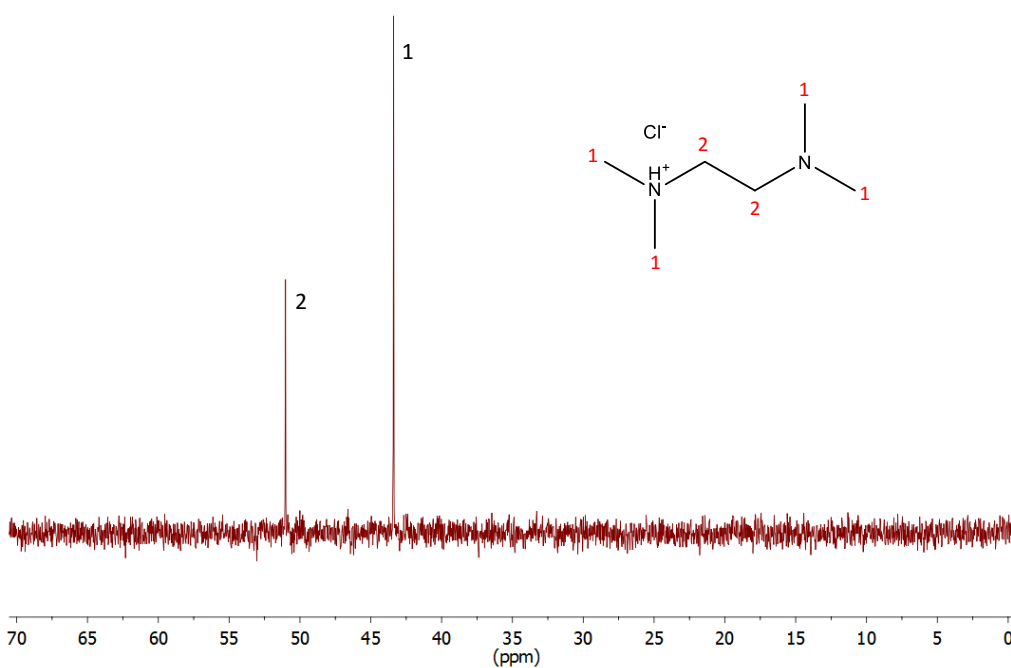

**Supplementary Figure 7.** NMR spectra of the purified  $[\text{N}_{11}[\text{2}(\text{N}_{11})_0]\text{Cl}]$  in  $\text{D}_2\text{O}$ , and after 12 h at 55 °C. (**a**)  $^1\text{H}$  NMR spectrum; (**b**)  $^{13}\text{C}$  NMR spectrum.  $^1\text{H}$  NMR ( $\text{D}_2\text{O}$ , 300 MHz, [ppm]):  $\delta$  3.54 (s, 4H,  $\text{N}(\underline{\text{C}}\text{H}_2)_2$ ), 2.88 (s, 12H,  $2[\text{N}(\underline{\text{C}}\text{H}_3)_2]$ ).  $^{13}\text{C}$  NMR ( $\text{D}_2\text{O}$ , 75.47 MHz, [ppm]):  $\delta$  51.0 ( $\text{N}(\underline{\text{C}}\text{H}_2)_2$ ), 43.4 ( $\text{N}(\underline{\text{C}}\text{H}_3)_2$ ).



**a**

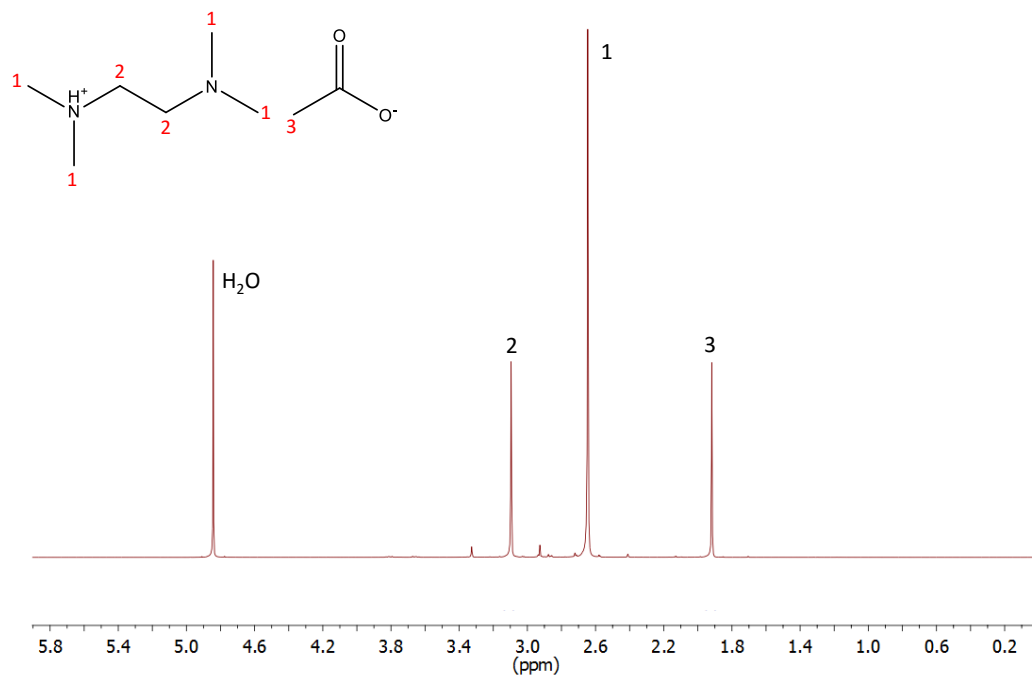

**b**

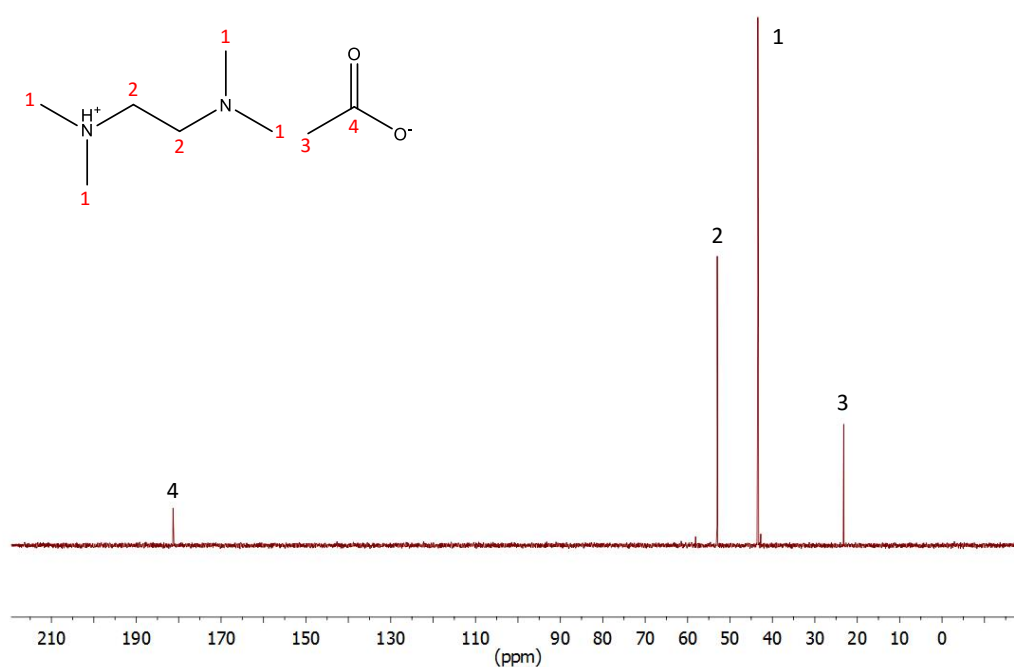

**Supplementary Figure 8.** NMR spectra of the purified  $[N_{11}[2(N_{11})_0]][C_1CO_2]$  in  $D_2O$ . (**a**)

$^1H$  NMR spectrum; (**b**)  $^{13}C$  NMR spectrum.  $^1H$  NMR ( $D_2O$ , 300 MHz, [ppm]):  $\delta$  3.10 (s, 4H,  $N(\underline{C}H_2)_2$ ), 2.65 (s, 12H,  $2[N(\underline{C}H_3)_2]$ ), 1.92 (s, 3H,  $\underline{C}H_3CO_2$ )  $^{13}C$  NMR ( $D_2O$ , 75.47 MHz, [ppm]):  $\delta$  181.3 ( $\underline{C}H_3\underline{C}O_2$ ), 53.0 ( $N(\underline{C}H_2)_2$ ), 43.4 ( $N(\underline{C}H_3)_2$ ), 23.2 ( $\underline{C}H_3CO_2$ ).

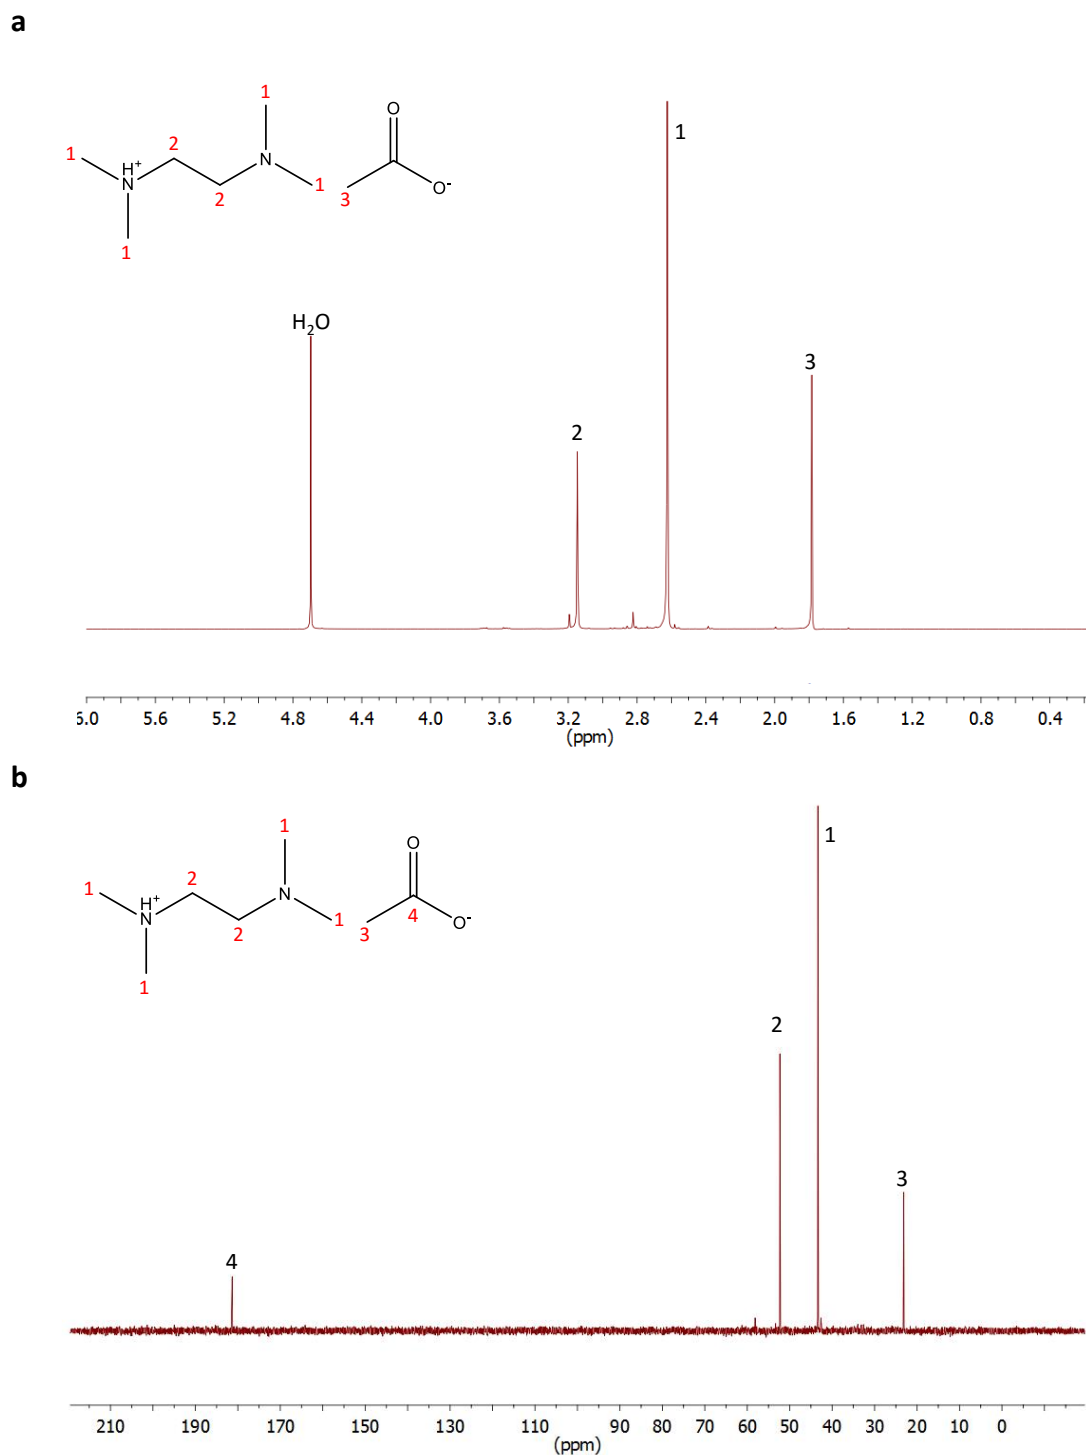

**Supplementary Figure 9.** NMR spectra of the purified  $[N_{11}]_2(N_{11})_0[C_1CO_2]$  in  $D_2O$ , and after 12 h at 55 °C. **(a)**  $^1H$  NMR spectrum; **(b)**  $^{13}C$  NMR spectrum.  $^1H$  NMR ( $D_2O$ , 300 MHz, [ppm]):  $\delta$  3.15 (s, 4H,  $N(\underline{C}H_2)_2$ ), 2.62 (s, 12H,  $2[N(\underline{C}H_3)_2]$ ), 1.78 (s, 3H,  $\underline{C}H_3CO_2$ )  $^{13}C$  NMR ( $D_2O$ , 75.47 MHz, [ppm]):  $\delta$  181.3 ( $\underline{C}H_3CO_2$ ), 52.3 ( $N(\underline{C}H_2)_2$ ), 43.4 ( $N(\underline{C}H_3)_2$ ), 23.1 ( $\underline{C}H_3CO_2$ ).

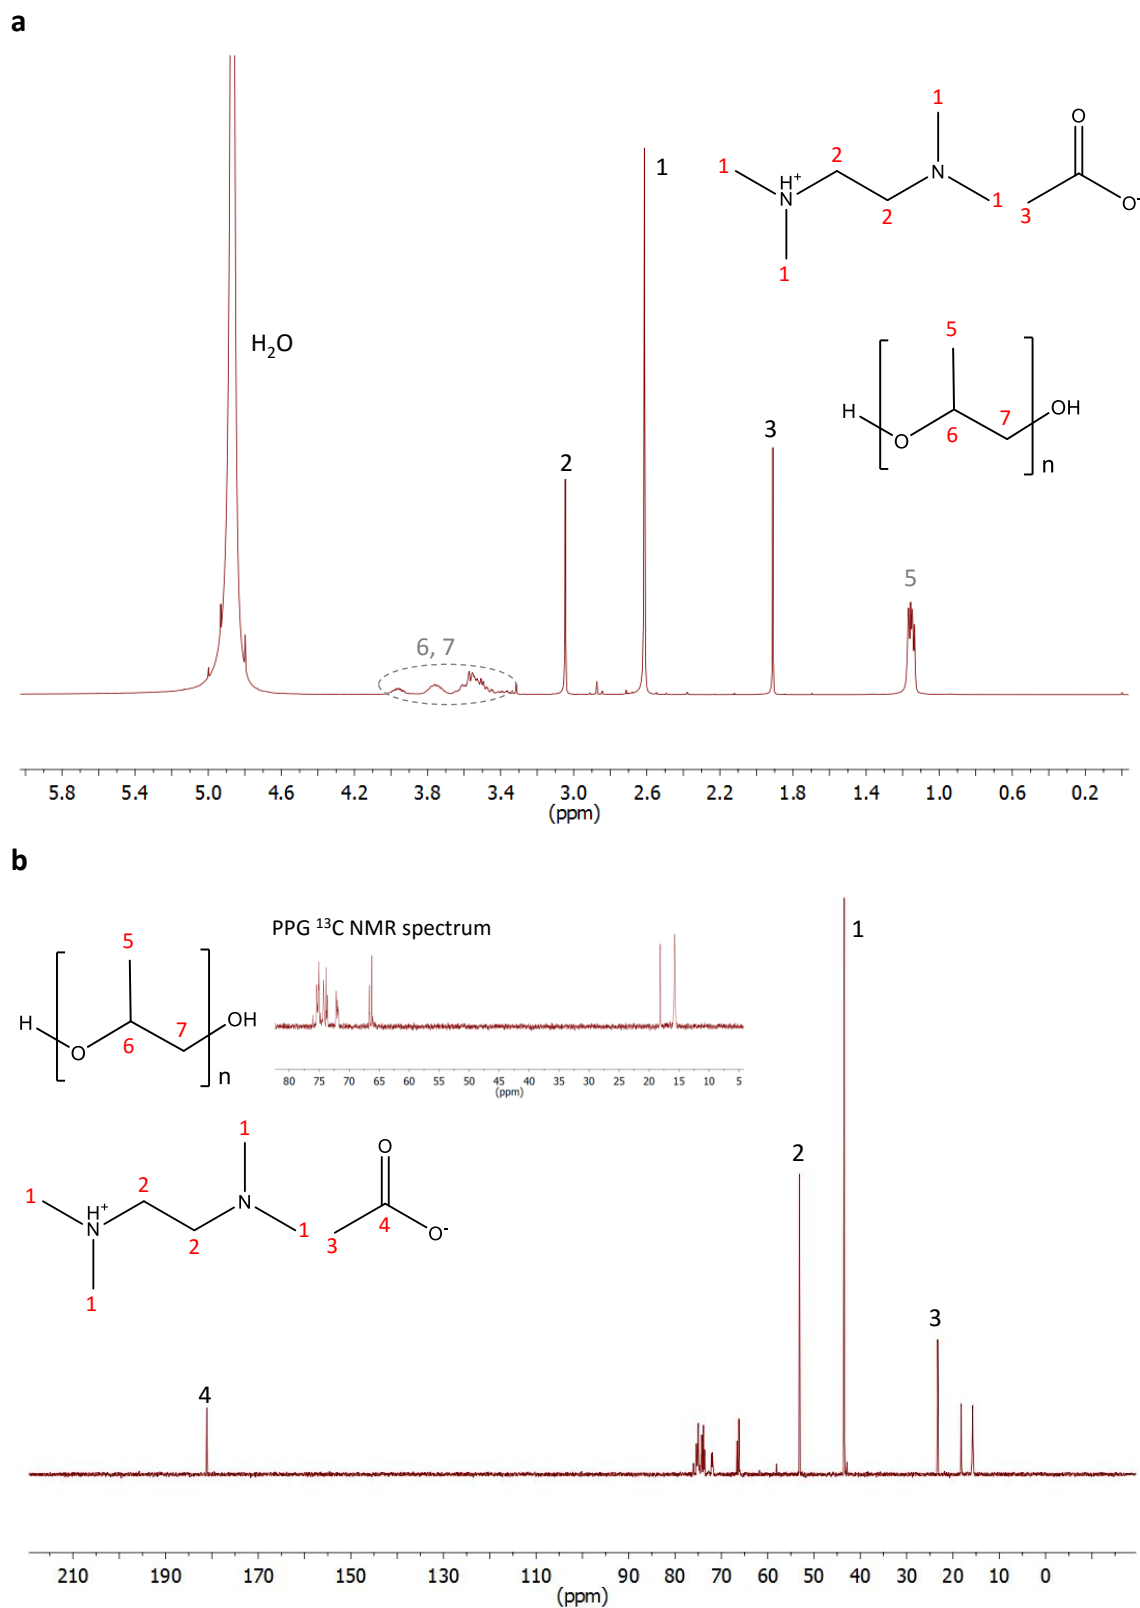

**Supplementary Figure 10.** NMR spectra of the PIL-rich phase of the ABS composed of 6 wt %  $[N_{11}[2(N_{11})]_0][C_1CO_2]$  + 30 wt % PPG + 54 wt %  $H_2O$  ABS in  $D_2O$ , and after 12 h at 55 °C. (a)  $^1H$  NMR spectrum; (b)  $^{13}C$  NMR spectrum.  $^1H$  NMR ( $D_2O$ , 300 MHz,

[ppm]:  $\delta$  4.02-3.34 (m,  $(n+2n)H$ ,  $n[\underline{C}H\underline{C}H_2]$ ), 3.05 (s, 4H,  $N(\underline{C}H_2)_2$ ), 2.61 (s, 12H,  $2[N(\underline{C}H_3)_2]$ ), 1.91 (s, 3H,  $\underline{C}H_3CO_2$ ), 1.17-1.14 (m,  $3nH$ ,  $n[\underline{C}H\underline{C}H_3]$ ).  $^{13}C$  NMR ( $D_2O$ , 75.47 MHz, [ppm]):  $\delta$  181.1 ( $\underline{C}H_3\underline{C}O_2$ ), 76.0-66.0 (PPG) 53.1 ( $N(\underline{C}H_2)_2$ ), 43.5 ( $N(\underline{C}H_3)_2$ ), 23.3 ( $\underline{C}H_3CO_2$ ), 18.2 (PPG), 15.8 (PPG).

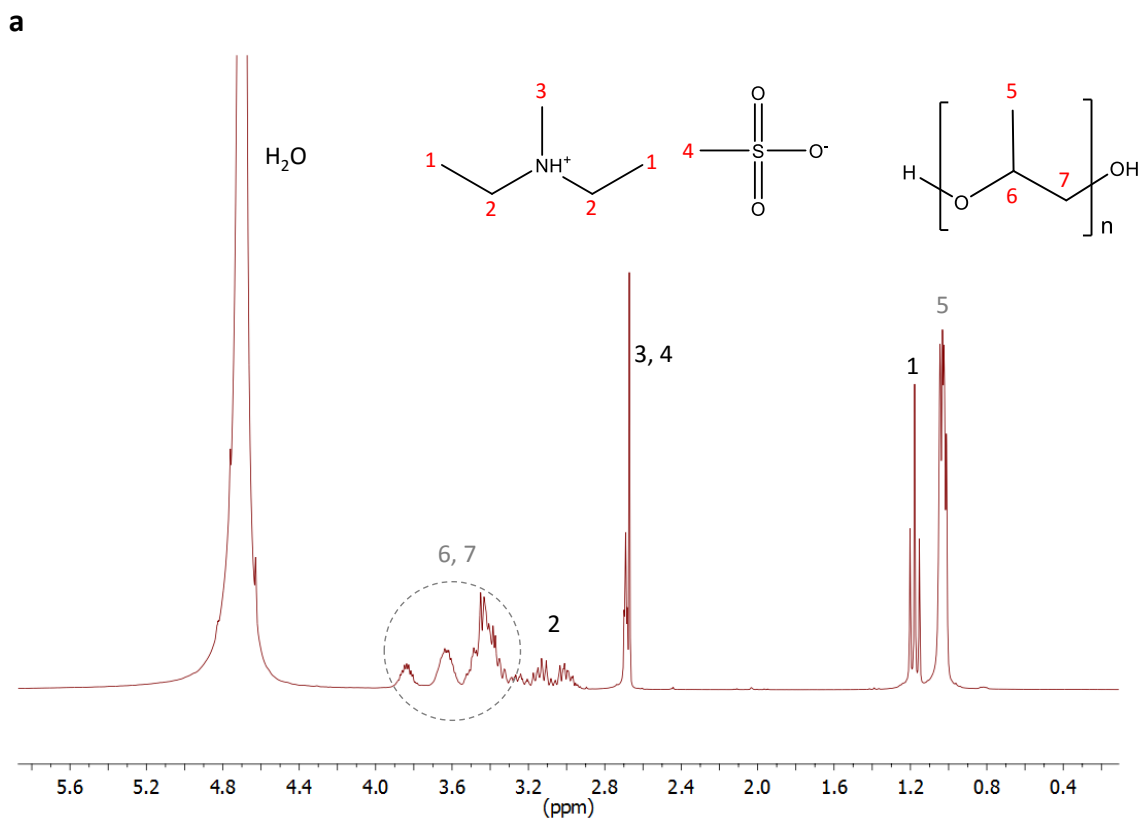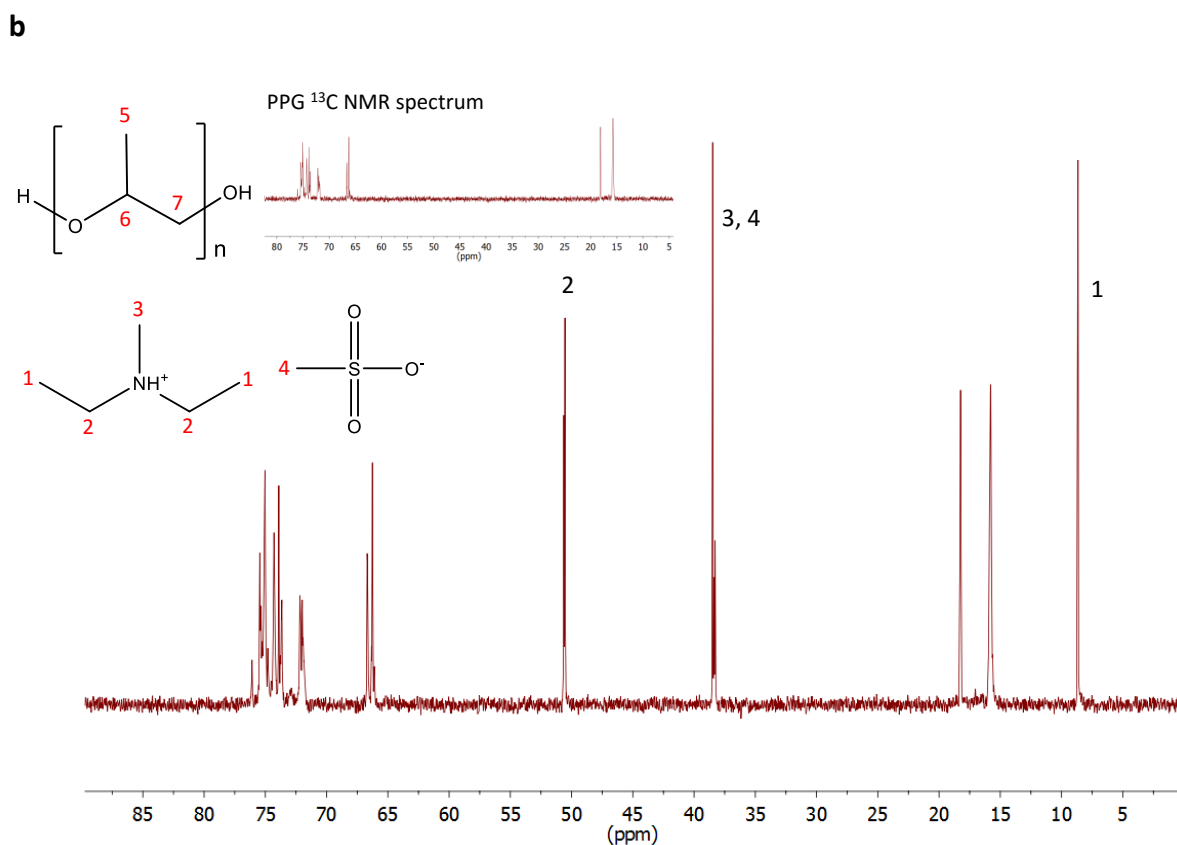

**Supplementary Figure 11.** NMR spectra of the PIL-rich phase of the ABS composed of 6 wt %  $[\text{N}_{1220}][\text{C}_1\text{SO}_3]$  + 30 wt % PPG + 54 wt %  $\text{H}_2\text{O}$  ABS in  $\text{D}_2\text{O}$ , and after 12 h at 55

°C. (a)  $^1\text{H}$  NMR spectrum. (b)  $^{13}\text{C}$  NMR spectrum.  $^1\text{H}$  NMR ( $\text{D}_2\text{O}$ , 300 MHz, [ppm]):  $\delta$  3.87-3.24 (m,  $(n+2n)\text{H}$ ,  $n[\text{CHCH}_2]$ ), 3.17-2.97 (m, 4H,  $\text{N}(\text{CH}_2\text{CH}_3)_2$ ), 2.69 (s, 3H,  $\text{NCH}_3$ ), 2.67 (s, 3H,  $\text{SCH}_3$ ), 1.20-1.15 (m, 6H,  $\text{N}(\text{CH}_2\text{CH}_3)_2$ ), 1.05-1.01 (m,  $3n\text{H}$ ,  $n[\text{CHCH}_3]$ ).  $^{13}\text{C}$  NMR ( $\text{D}_2\text{O}$ , 75.47 MHz, [ppm]):  $\delta$  76.1-66.1 (PPG), 50.5 ( $\text{N}(\text{CH}_2\text{CH}_3)_2$ ), 38.4 ( $\text{NCH}_3$ ), 38.3 ( $\text{SCH}_3$ ), 18.2 (PPG), 15.8 (PPG) 8.7 ( $\text{N}(\text{CH}_2\text{CH}_3)_2$ ).

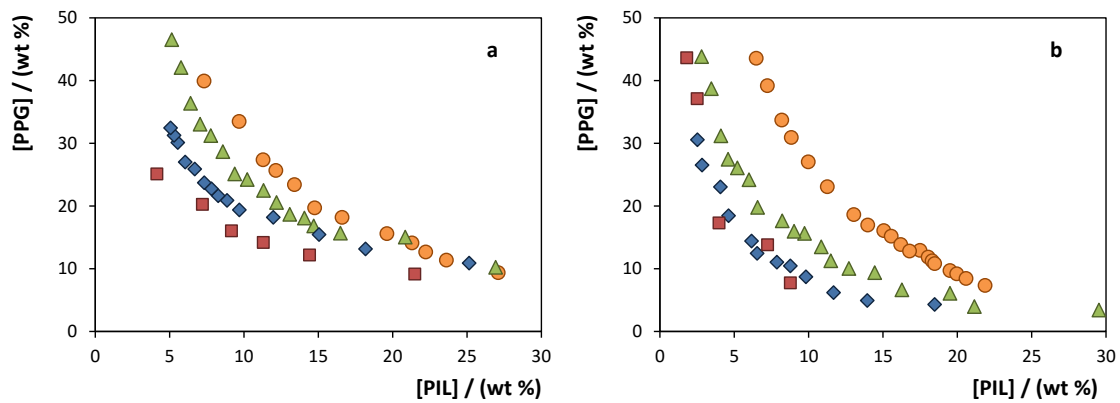

**Supplementary Figure 12.** Evaluation of the temperature effect in the phase diagrams behavior of ABS composed of PIL + PPG + H<sub>2</sub>O at 25 °C (orange circle), 35 °C (green triangles), 45 °C (blue diamonds) and 55 °C (red squares). *(a)* [N<sub>1220</sub>][C<sub>1</sub>SO<sub>3</sub>]. *(b)* [N<sub>11</sub>[<sub>2</sub>(N<sub>11</sub>)]<sub>0</sub>]Cl.

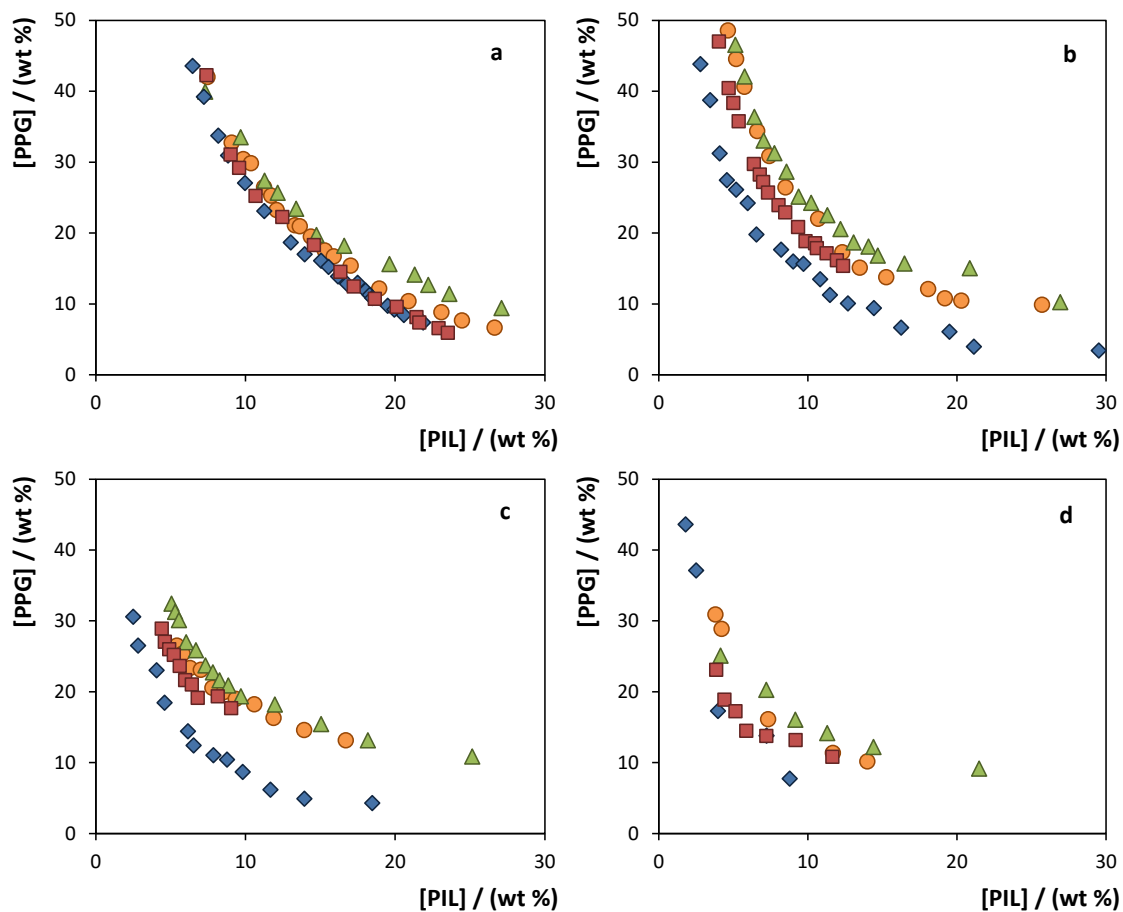

**Supplementary Figure 13.** Evaluation of the IL effect in the phase diagrams behavior of ABS composed of PIL + PPG + H<sub>2</sub>O: [N<sub>1120</sub>][C<sub>1</sub>CO<sub>2</sub>] (orange circles), [N<sub>1220</sub>][C<sub>1</sub>SO<sub>3</sub>] (green triangles), [N<sub>11[2(N11)]0</sub>]Cl (blue diamonds), [N<sub>11[2(N11)]0</sub>][C<sub>1</sub>CO<sub>2</sub>] (red squares). (a) 25 °C. (b) 35 °C. (c) 45 °C. (d) 55 °C.



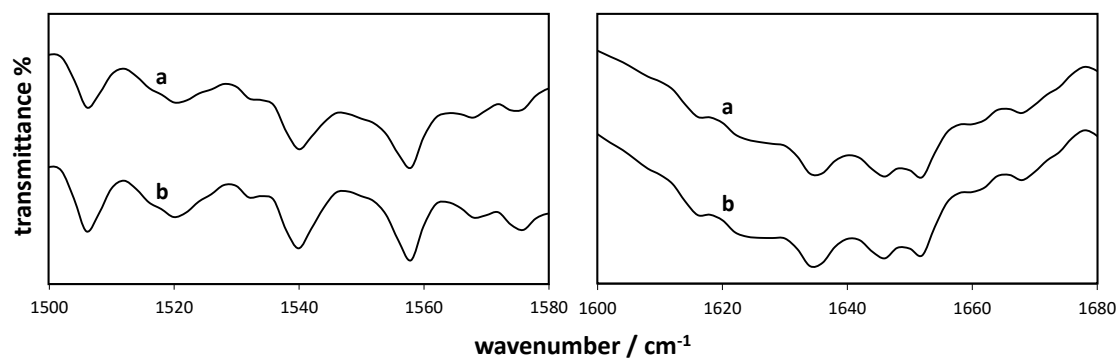

**Supplementary Figure 14.** FTIR spectra of (a) PIL-rich phase of ABS composed of 6 wt % of  $[N_{11}[2(N_{11})]_0][C_1CO_2]$  + 30 wt % of PPG + 64 wt % H<sub>2</sub>O with azocasein at 45 °C and (b) azocasein in a buffered aqueous solution at pH 7 (PBS) at 25 °C.

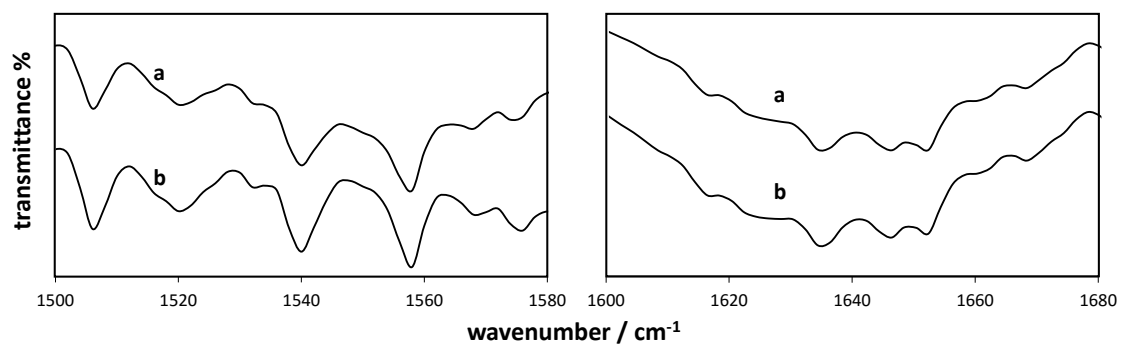

**Supplementary Figure 15.** FTIR spectra of (a) PIL-rich phase of ABS composed of 6 wt % of  $[N_{11}[2(N_{11})_0][C_1CO_2]$  + 30 wt % of PPG + 64 wt % H<sub>2</sub>O with cytochrome c at 45 °C and (b) cytochrome c in a buffered aqueous solution at pH 7 (PBS) at 25 °C.

## Supplementary Tables

**Supplementary Table 1.** Experimental weight fraction data for the system composed of PPG (1) + PIL (2) + H<sub>2</sub>O (3) at 25 °C and atmospheric pressure.

| [N <sub>1120</sub> ][C <sub>1</sub> CO <sub>2</sub> ] |                           | [N <sub>1220</sub> ][C <sub>1</sub> SO <sub>3</sub> ] |                           | [N <sub>11[2(N11)]0</sub> ]Cl |                           | [N <sub>11[2(N11)]0</sub> ][C <sub>1</sub> CO <sub>2</sub> ] |                           |
|-------------------------------------------------------|---------------------------|-------------------------------------------------------|---------------------------|-------------------------------|---------------------------|--------------------------------------------------------------|---------------------------|
| 100 <i>w</i> <sub>1</sub>                             | 100 <i>w</i> <sub>2</sub> | 100 <i>w</i> <sub>1</sub>                             | 100 <i>w</i> <sub>2</sub> | 100 <i>w</i> <sub>1</sub>     | 100 <i>w</i> <sub>2</sub> | 100 <i>w</i> <sub>1</sub>                                    | 100 <i>w</i> <sub>2</sub> |
| 82.53                                                 | 3.55                      | 51.93                                                 | 5.39                      | 43.56                         | 6.47                      | 42.25                                                        | 7.39                      |
| 50.09                                                 | 6.61                      | 39.95                                                 | 7.31                      | 39.21                         | 7.21                      | 31.08                                                        | 9.00                      |
| 42.00                                                 | 7.45                      | 33.50                                                 | 9.67                      | 33.71                         | 8.17                      | 29.19                                                        | 9.57                      |
| 32.75                                                 | 9.07                      | 27.37                                                 | 11.28                     | 30.97                         | 8.83                      | 25.25                                                        | 10.67                     |
| 30.44                                                 | 9.85                      | 25.68                                                 | 12.14                     | 27.05                         | 9.96                      | 22.25                                                        | 12.45                     |
| 29.86                                                 | 10.37                     | 23.40                                                 | 13.39                     | 23.09                         | 11.25                     | 18.32                                                        | 14.57                     |
| 26.45                                                 | 11.24                     | 19.73                                                 | 14.74                     | 18.66                         | 13.02                     | 14.51                                                        | 16.34                     |
| 25.28                                                 | 11.72                     | 18.19                                                 | 16.60                     | 16.98                         | 13.96                     | 12.47                                                        | 17.23                     |
| 23.22                                                 | 12.08                     | 15.61                                                 | 19.62                     | 16.10                         | 15.04                     | 10.72                                                        | 18.64                     |
| 21.08                                                 | 13.30                     | 14.13                                                 | 21.31                     | 15.21                         | 15.55                     | 9.58                                                         | 20.10                     |
| 20.95                                                 | 13.63                     | 12.66                                                 | 22.21                     | 13.86                         | 16.19                     | 8.11                                                         | 21.42                     |
| 19.48                                                 | 14.36                     | 11.39                                                 | 23.62                     | 12.95                         | 17.49                     | 7.37                                                         | 21.61                     |
| 17.54                                                 | 15.29                     | 9.39                                                  | 27.10                     | 12.83                         | 16.78                     | 6.56                                                         | 22.89                     |
| 16.70                                                 | 15.89                     |                                                       |                           | 11.88                         | 18.02                     | 5.92                                                         | 23.52                     |
| 15.40                                                 | 17.03                     |                                                       |                           | 11.27                         | 18.29                     |                                                              |                           |
| 12.16                                                 | 18.93                     |                                                       |                           | 10.83                         | 18.47                     |                                                              |                           |
| 10.37                                                 | 20.88                     |                                                       |                           | 9.73                          | 19.49                     |                                                              |                           |
| 8.83                                                  | 23.09                     |                                                       |                           | 9.18                          | 19.95                     |                                                              |                           |
| 7.67                                                  | 24.46                     |                                                       |                           | 8.44                          | 20.57                     |                                                              |                           |
| 6.64                                                  | 26.64                     |                                                       |                           | 7.35                          | 21.86                     |                                                              |                           |

**Supplementary Table 2.** Experimental weight fraction data for the system composed of PPG (1) + PIL (2) + H<sub>2</sub>O (3) at 35 °C and atmospheric pressure.

| [N <sub>1120</sub> ][C <sub>1</sub> CO <sub>2</sub> ] |                           | [N <sub>1220</sub> ][C <sub>1</sub> SO <sub>3</sub> ] |                           | [N <sub>11[2(N11)]0</sub> ]Cl |                           | [N <sub>11[2(N11)]0</sub> ][C <sub>1</sub> CO <sub>2</sub> ] |                           |
|-------------------------------------------------------|---------------------------|-------------------------------------------------------|---------------------------|-------------------------------|---------------------------|--------------------------------------------------------------|---------------------------|
| 100 <i>w</i> <sub>1</sub>                             | 100 <i>w</i> <sub>2</sub> | 100 <i>w</i> <sub>1</sub>                             | 100 <i>w</i> <sub>2</sub> | 100 <i>w</i> <sub>1</sub>     | 100 <i>w</i> <sub>2</sub> | 100 <i>w</i> <sub>1</sub>                                    | 100 <i>w</i> <sub>2</sub> |
| 56.54                                                 | 3.63                      | 53.49                                                 | 4.12                      | 43.83                         | 2.79                      | 47.01                                                        | 4.03                      |
| 48.58                                                 | 4.64                      | 46.54                                                 | 5.14                      | 38.72                         | 3.44                      | 40.43                                                        | 4.69                      |
| 44.56                                                 | 5.20                      | 42.07                                                 | 5.77                      | 31.21                         | 4.09                      | 38.34                                                        | 5.01                      |
| 40.63                                                 | 5.75                      | 36.38                                                 | 6.41                      | 27.46                         | 4.57                      | 35.78                                                        | 5.36                      |
| 34.38                                                 | 6.60                      | 33.03                                                 | 7.04                      | 26.10                         | 5.20                      | 29.75                                                        | 6.37                      |
| 30.84                                                 | 7.41                      | 31.24                                                 | 7.76                      | 24.211                        | 5.97                      | 28.23                                                        | 6.77                      |
| 26.44                                                 | 8.51                      | 28.66                                                 | 8.57                      | 19.80                         | 6.56                      | 27.19                                                        | 6.99                      |
| 22.00                                                 | 10.70                     | 25.12                                                 | 9.37                      | 17.65                         | 8.21                      | 25.69                                                        | 7.33                      |
| 17.28                                                 | 12.31                     | 24.25                                                 | 10.22                     | 15.97                         | 9.01                      | 23.94                                                        | 8.04                      |
| 15.10                                                 | 13.49                     | 22.50                                                 | 11.31                     | 15.65                         | 9.71                      | 22.89                                                        | 8.49                      |
| 13.77                                                 | 15.26                     | 20.57                                                 | 12.18                     | 13.48                         | 10.83                     | 20.82                                                        | 9.35                      |
| 12.09                                                 | 18.07                     | 18.67                                                 | 13.08                     | 11.27                         | 11.48                     | 18.83                                                        | 9.85                      |
| 10.79                                                 | 19.19                     | 18.07                                                 | 14.06                     | 10.06                         | 12.69                     | 18.55                                                        | 10.48                     |
| 10.44                                                 | 20.29                     | 16.81                                                 | 14.68                     | 9.39                          | 14.43                     | 17.86                                                        | 10.60                     |
| 9.89                                                  | 25.71                     | 15.67                                                 | 16.48                     | 6.63                          | 16.26                     | 17.13                                                        | 11.26                     |
|                                                       |                           | 15.03                                                 | 20.85                     | 6.08                          | 19.50                     | 16.14                                                        | 11.94                     |
|                                                       |                           | 10.25                                                 | 26.92                     | 3.97                          | 21.13                     | 15.35                                                        | 12.36                     |
|                                                       |                           |                                                       |                           | 3.43                          | 29.51                     |                                                              |                           |

**Supplementary Table 3.** Experimental weight fraction data for the system composed of PPG (1) + PIL (2) + H<sub>2</sub>O (3) at 45 °C and atmospheric pressure.

| [N <sub>1120</sub> ][C <sub>1</sub> CO <sub>2</sub> ] |                           | [N <sub>1220</sub> ][C <sub>1</sub> SO <sub>3</sub> ] |                           | [N <sub>11[2(N11)]0</sub> ]Cl |                           | [N <sub>11[2(N11)]0</sub> ][C <sub>1</sub> CO <sub>2</sub> ] |                           |
|-------------------------------------------------------|---------------------------|-------------------------------------------------------|---------------------------|-------------------------------|---------------------------|--------------------------------------------------------------|---------------------------|
| 100 <i>w</i> <sub>1</sub>                             | 100 <i>w</i> <sub>2</sub> | 100 <i>w</i> <sub>1</sub>                             | 100 <i>w</i> <sub>2</sub> | 100 <i>w</i> <sub>1</sub>     | 100 <i>w</i> <sub>2</sub> | 100 <i>w</i> <sub>1</sub>                                    | 100 <i>w</i> <sub>2</sub> |
| 26.52                                                 | 5.42                      | 32.47                                                 | 5.06                      | 30.58                         | 2.50                      | 28.93                                                        | 4.40                      |
| 25.41                                                 | 5.79                      | 31.28                                                 | 5.30                      | 26.53                         | 2.82                      | 27.07                                                        | 4.61                      |
| 23.37                                                 | 6.29                      | 30.12                                                 | 5.55                      | 23.06                         | 4.05                      | 26.04                                                        | 4.89                      |
| 23.12                                                 | 7.02                      | 27.00                                                 | 6.04                      | 18.46                         | 4.60                      | 25.24                                                        | 5.21                      |
| 20.57                                                 | 7.78                      | 25.88                                                 | 6.69                      | 14.43                         | 6.16                      | 23.65                                                        | 5.60                      |
| 19.96                                                 | 8.53                      | 23.73                                                 | 7.33                      | 12.45                         | 6.53                      | 21.66                                                        | 5.96                      |
| 19.03                                                 | 9.35                      | 22.76                                                 | 7.82                      | 11.05                         | 7.86                      | 21.04                                                        | 6.40                      |
| 18.27                                                 | 10.59                     | 21.64                                                 | 8.26                      | 10.46                         | 8.76                      | 19.16                                                        | 6.81                      |
| 16.32                                                 | 11.86                     | 20.91                                                 | 8.86                      | 8.71                          | 9.82                      | 19.36                                                        | 8.14                      |
| 14.63                                                 | 13.92                     | 19.38                                                 | 9.68                      | 6.20                          | 11.66                     | 17.70                                                        | 9.05                      |
| 13.16                                                 | 16.70                     | 18.21                                                 | 11.96                     | 4.94                          | 13.94                     |                                                              |                           |
|                                                       |                           | 15.45                                                 | 15.04                     | 4.32                          | 18.46                     |                                                              |                           |
|                                                       |                           | 13.17                                                 | 18.17                     | 3.34                          | 30.05                     |                                                              |                           |
|                                                       |                           | 10.89                                                 | 25.15                     |                               |                           |                                                              |                           |

**Supplementary Table 4.** Experimental weight fraction data for the system composed of PPG (1) + PIL (2) + H<sub>2</sub>O (3) at 55 °C and atmospheric pressure.

| [N <sub>1120</sub> ][C <sub>1</sub> CO <sub>2</sub> ] |                    | [N <sub>1220</sub> ][C <sub>1</sub> SO <sub>3</sub> ] |                    | [N <sub>11[2(N11)]0</sub> ]Cl |                    | [N <sub>11[2(N11)]0</sub> ][C <sub>1</sub> CO <sub>2</sub> ] |                    |
|-------------------------------------------------------|--------------------|-------------------------------------------------------|--------------------|-------------------------------|--------------------|--------------------------------------------------------------|--------------------|
| 100 w <sub>1</sub>                                    | 100 w <sub>2</sub> | 100 w <sub>1</sub>                                    | 100 w <sub>2</sub> | 100 w <sub>1</sub>            | 100 w <sub>2</sub> | 100 w <sub>1</sub>                                           | 100 w <sub>2</sub> |
| 30.92                                                 | 3.78               | 25.11                                                 | 4.14               | 43.62                         | 1.79               | 23.12                                                        | 3.84               |
| 28.90                                                 | 4.20               | 20.29                                                 | 7.21               | 37.12                         | 2.50               | 18.91                                                        | 4.40               |
| 16.15                                                 | 7.33               | 16.06                                                 | 9.15               | 17.30                         | 3.96               | 17.28                                                        | 5.14               |
| 11.38                                                 | 11.67              | 14.19                                                 | 11.30              | 13.84                         | 7.22               | 14.50                                                        | 5.86               |
| 10.21                                                 | 13.99              | 12.21                                                 | 14.40              | 7.75                          | 8.77               | 13.80                                                        | 7.20               |
|                                                       |                    | 9.17                                                  | 21.48              |                               |                    | 13.21                                                        | 9.17               |
|                                                       |                    |                                                       |                    |                               |                    | 10.86                                                        | 11.64              |

**Supplementary Table 5.** Experimental data for tie-lines and tie-line length (TLL) of PILs + PPG ABS at 25 °C, and pH of the coexisting phases.

| PIL                                                          | Weight fraction composition / wt % |                     |                   |                    |                    |                      |                      |                   | TLL   |
|--------------------------------------------------------------|------------------------------------|---------------------|-------------------|--------------------|--------------------|----------------------|----------------------|-------------------|-------|
|                                                              | [PIL] <sub>PIL</sub>               | [PPG] <sub>IL</sub> | pH <sub>PIL</sub> | [PIL] <sub>M</sub> | [PPG] <sub>M</sub> | [PIL] <sub>PPG</sub> | [PPG] <sub>PPG</sub> | pH <sub>PPG</sub> |       |
| [N <sub>1120</sub> ][C <sub>1</sub> CO <sub>2</sub> ]        | 22.98                              | 8.10                | 6.00              | 11.13              | 49.94              | 4.00                 | 75.10                | 5.87              | 69.63 |
|                                                              | 26.13                              | 6.02                | 5.98              | 9.96               | 59.65              | 3.63                 | 80.62                | 5.87              | 77.91 |
| [N <sub>1220</sub> ][C <sub>1</sub> SO <sub>3</sub> ]        | 22.82                              | 11.63               | 2.88              | 14.94              | 40.22              | 1.77                 | 88.03                | 3.43              | 79.25 |
|                                                              | 32.98                              | 5.36                | 2.32              | 20.10              | 40.07              | 1.68                 | 89.72                | 2.21              | 89.97 |
| [N <sub>11[2(N11)]0</sub> ]Cl                                | 16.97                              | 12.67               | 3.96              | 7.92               | 54.61              | 3.18                 | 76.55                | 3.78              | 65.35 |
|                                                              | 23.66                              | 6.62                | 3.97              | 10.75              | 54.62              | 2.73                 | 84.43                | 3.90              | 80.57 |
| [N <sub>11[2(N11)]0</sub> ][C <sub>1</sub> CO <sub>2</sub> ] | 18.86                              | 10.54               | 7.93              | 10.15              | 50.27              | 3.31                 | 81.48                | 7.95              | 72.62 |
|                                                              | 27.16                              | 4.32                | 7.92              | 12.97              | 50.14              | 3.32                 | 81.32                | 7.96              | 80.61 |

**Supplementary Table 6.** Electrical conductivity ( $\kappa$ ) data for the PIL-rich and PPG-rich phases of the systems composed of PPG + PIL + H<sub>2</sub>O (1:1000 (v:v) dilution).

| PIL                                                          | [PIL] <sub>M</sub> | [PPG] <sub>M</sub> | 10 <sup>-3</sup> $\kappa$ / ( $\mu\text{S}\cdot\text{cm}^{-1}$ ) |              |
|--------------------------------------------------------------|--------------------|--------------------|------------------------------------------------------------------|--------------|
|                                                              |                    |                    | Top phase                                                        | Bottom phase |
| <b>25 °C</b>                                                 |                    |                    |                                                                  |              |
| [N <sub>1120</sub> ][C <sub>1</sub> CO <sub>2</sub> ]        | 11.13              | 49.94              | 118.1                                                            | 23.5         |
|                                                              | 9.96               | 59.65              | 134.8                                                            | 21.4         |
| [N <sub>1220</sub> ][C <sub>1</sub> SO <sub>3</sub> ]        | 14.94              | 40.22              | 69.0                                                             | 105.1        |
|                                                              | 20.10              | 40.07              | 64.2                                                             | 156.8        |
| [N <sub>11[2(N11)]0</sub> ]Cl                                | 7.92               | 54.61              | 6.44                                                             | 308.0        |
|                                                              | 10.75              | 54.62              | 3.73                                                             | 421.0        |
| [N <sub>11[2(N11)]0</sub> ][C <sub>1</sub> CO <sub>2</sub> ] | 10.15              | 50.27              | 89.2                                                             | 9.76         |
|                                                              | 12.97              | 50.14              | 110.8                                                            | 9.36         |
| <b>45 °C</b>                                                 |                    |                    |                                                                  |              |
| [N <sub>11[2(N11)]0</sub> ][C <sub>1</sub> CO <sub>2</sub> ] | 6.00               | 30.00              | 9.09                                                             | 64.2         |



**Supplementary Table 7.** Extraction efficiencies of cytochrome c ( $EE_{Cyt}\%$ ) and azocasein ( $EE_{Azo}\%$ ) for the PIL-rich phase, obtained in ternary mixture composed of 6 wt % of  $[N_{11}[2(N_{11})]_0][C_1CO_2]$  + 30 wt % of PPG + 64 wt % of an aqueous solution containing the proteins at 1, 2 and 3  $g\cdot L^{-1}$ , and equilibrated at 45 °C.

|                                     | $EE_{Azo}\% \pm 0.9$ | $EE_{Cyt}\% \pm 0.3$ |
|-------------------------------------|----------------------|----------------------|
| <b>1 <math>g\cdot L^{-1}</math></b> | 95.36                | 99.85                |
| <b>2 <math>g\cdot L^{-1}</math></b> | 95.56                | 100.00               |
| <b>3 <math>g\cdot L^{-1}</math></b> | 95.30                | 100.00               |

**Supplementary Table 8.** pH data for the PIL-rich and PPG-rich phases of the systems composed of PPG + PIL + H<sub>2</sub>O at 25, 35, 45 and 55 °C for the following mixtures points: 9.96 wt % [N<sub>1120</sub>][C<sub>1</sub>CO<sub>2</sub>] + 59.65 wt % PPG + 30.39 wt % H<sub>2</sub>O; 20.10 wt % [N<sub>1220</sub>][C<sub>1</sub>SO<sub>3</sub>] + 40.07 wt % PPG + 39.83 wt % H<sub>2</sub>O; 10.75 wt % [N<sub>11[2(N11)]0</sub>]Cl + 54.62 wt % PPG + 34.63 wt % H<sub>2</sub>O; and 15.28 wt % [N<sub>11[2(N11)]0</sub>][C<sub>1</sub>CO<sub>2</sub>] + 59.65 wt % PPG + 25.07 wt % H<sub>2</sub>O.

| PIL                                                          | 25 °C             |                   | 35 °C             |                   | 45 °C             |                   | 55 °C             |                   |
|--------------------------------------------------------------|-------------------|-------------------|-------------------|-------------------|-------------------|-------------------|-------------------|-------------------|
|                                                              | pH <sub>PIL</sub> | pH <sub>PPG</sub> | pH <sub>PIL</sub> | pH <sub>PPG</sub> | pH <sub>PIL</sub> | pH <sub>PPG</sub> | pH <sub>PIL</sub> | pH <sub>PPG</sub> |
| [N <sub>1120</sub> ][C <sub>1</sub> CO <sub>2</sub> ]        | 5.98              | 5.87              | 6.30              | 6.26              | 5.98              | 5.85              | 6.03              | 6.19              |
| [N <sub>1220</sub> ][C <sub>1</sub> SO <sub>3</sub> ]        | 2.32              | 2.21              | 2.64              | 2.93              | 2.42              | 2.31              | 2.14              | 2.77              |
| [N <sub>11[2(N11)]0</sub> ]Cl                                | 3.97              | 3.90              | 3.73              | 3.65              | 3.92              | 3.85              | 3.52              | 3.61              |
| [N <sub>11[2(N11)]0</sub> ][C <sub>1</sub> CO <sub>2</sub> ] | 7.74              | 7.83              | 8.07              | 7.96              | 7.84              | 7.77              | 8.02              | 8.00              |

**Supplementary Table 9.** Correlation parameters used to describe the experimental binodal data at 25 °C by equation (1).

| <b>IL</b>                                                    | <b><math>A \pm \sigma</math></b> | <b><math>B \pm \sigma</math></b> | <b><math>10^5 C \pm \sigma</math></b> | <b><math>R^2</math></b> |
|--------------------------------------------------------------|----------------------------------|----------------------------------|---------------------------------------|-------------------------|
| [N <sub>1120</sub> ][C <sub>1</sub> CO <sub>2</sub> ]        | 339.3 ± 11.8                     | -0.754 ± 0.014                   | 1.00 ± 0.59                           | 0.9976                  |
| [N <sub>1220</sub> ][C <sub>1</sub> SO <sub>3</sub> ]        | 183.5 ± 14.6                     | -0.553 ± 0.030                   | 1.00 ± 0.68                           | 0.9944                  |
| [N <sub>11[2(N11)]0</sub> ]Cl                                | 290.0 ± 17.9                     | -0.747 ± 0.023                   | 1.12 ± 0.65                           | 0.9985                  |
| [N <sub>11[2(N11)]0</sub> ][C <sub>1</sub> CO <sub>2</sub> ] | 327.5 ± 63.0                     | -0.765 ± 0.067                   | 1.71 ± 1.49                           | 0.9928                  |
